# Supplementary material for: Copper-mediated controlled radical ring-opening polymerization (RROP) of a vinylcycloalkane
Source: Royal Society of Chemistry journal article supplement (doi:10.1039/b801149d), 2008-01-01
Supplement: b801149d.pdf [file b801149d.pdf]

## Supporting information:

### Copper Mediated Controlled Radical Ring Opening Polymerization (RROP) of a vinyl cycloalkane

Nikhil Kumar Singha,\*<sup>a</sup> Amalin Kavitha<sup>a</sup>, P. Sarker<sup>b</sup>, Steve Rimmer<sup>b</sup>

<sup>a</sup> Rubber Technology Centre, Indian Institute of Technology, Kharagpur 721302, India

<sup>b</sup> Department of Chemistry, University of Sheffield, Sheffield S3 7HF, UK

#### Materials and Characterizations:

† 1, 1 bis (ethoxy carbonyl)-2-vinylcyclopropane, the monomer was synthesized from dibromo-2-butene and diethyl malonate in presence of NaH in THF solvent (see the supplementary information for details).

‡ <sup>1</sup>H NMR were recorded at 25<sup>o</sup>C in CDCl<sub>3</sub> on a 200 MHz Bruker NMR spectrometer.

§ GPC analysis was performed on a Viscotek GPC chromatography equipped with a refractive index detector model VE 3580 and two ViscoGEL GPC columns GMHHR-H #17360 connected in series. THF was used as the eluent at a flow rate of 1.0 ml/min and calibration was carried out using low polydispersity polystyrene standards. Data acquisition and processing were performed using Viscotek OMNI-01 software.

¶ DSC analysis was recorded on a Pyris Diamond DSC, Perkin Elmer (UK) under nitrogen atmosphere from -100<sup>o</sup>C to 150<sup>o</sup>C at a heating rate of 20<sup>o</sup>C/min. The glass transition temperature (T<sub>g</sub>) was determined from the inclination point in the second heating curve.

≠ MALDI-TOF-MS analyses were carried out using a Perceptive Biosystems Voyager Elite MALDI-TOF mass spectrometer, equipped with a nitrogen laser (wavelength 337 nm). In this case 2,5-dihydroxybenzoic acid was used as a matrix and sodium trifluoroacetate was used as the cationic agent. The matrix, salt, and polymer solutions were premixed in THF in the ratio of 10/1/10.

## Synthesis:

**1. Preparation of 1,1-bis(ethoxycarbonyl)-2-vinylcyclopropane:** A solution of 1,4-dibromo-2-butene (12.84 mg, 0.06 mol.) and diethyl malonate (7.5 g, 0.06 mol.) in THF (50 ml) was added dropwise into NaH (2.8 g, 0.12 mol.) in THF (200 ml) at 0°C temperature. After the addition of NaH, the reaction mixture was refluxed at 70°C overnight. The resulting mass was filtered off and washed with ethanol twice. The combined filtrate was evaporated, and the residue was distilled under reduced pressure (65°C/4 mm Hg). The product was characterized by <sup>1</sup>HNMR and <sup>13</sup>CNMR, elemental analysis and GC-MS. Yield: 18.5g (90%), purity: 100% (by GC and TLC). <sup>1</sup>HNMR: δ = 1.30 (t, 6H), 1.48–1.54 (m, 2H), 2.4–2.53 (m, 1H), 4.25 (q, 4H) and 5.15 – 5.52 (m, 3H) ppm. **Elemental analysis Calc.** C 62.26 H 7.55; Found C 62.57 and H 7.75. **GC-MS:** GC Ret. Time, 9.02 and MS MH<sup>+</sup>, 213 (NH<sub>3</sub>).

**2. ATRP of ECVCP:** In a typical experiment 1.0 g (4.7 x 10<sup>-3</sup> mol) of ECVCP and 2 ml of toluene were taken in a 25ml three neck round bottom flask. The flask was equipped with a condenser in one neck and a rubber septum in the other. Argon gas was passed through the solution for about 15 min to remove oxygen from the reaction mixture. CuBr (7.4 mg, 5.12 x 10<sup>-5</sup> mol) and PMDETA (15 mg, 8.20 x 10<sup>-5</sup> mol) were added to the flask. The polymerization was started by immersing the flask into oil bath already preheated at 90°C and by adding EBiB (20 mg, 1.03 x 10<sup>-4</sup> mol) or PEBR (19 mg, 1.02 x 10<sup>-4</sup> mol) as initiator. The samples were purified by passing through alumina column prior to the different analysis like GPC, <sup>1</sup>HNMR and DSC analysis. M<sub>n</sub> GPC = 3033, PDI = 1.16, M<sub>n</sub> MALDI = 2980, PDI = 1.32, <sup>1</sup>HNMR: δ = 1.10 (6H), 2.4 (4H), 4.2 (4H), 5.3 (2H)

**3. General procedure for RROP of 1,1-bis(ethoxycarbonyl)-2-vinylcyclopropane (ECVCP) in solution and in bulk:** In a polymerization ampoule ECVCP, AIBN and subsequently a dry solvent were introduced. The ampoule was cooled under liquid N<sub>2</sub>, degassed several times by the freeze-pump thaw method and then was sealed off under vacuum. The polymerization was carried out at 60°C for 20 hours. The resulting mixtures was diluted with chloroform and poured into methanol/water mixture (4:1, by volume) to precipitate the polymer.

**List of supplementary information:**

S<sub>1</sub> : DSC traces of PECVCP prepared by RROP

S<sub>2</sub> : DSC traces of PECVCP prepared by ATRROP

S<sub>3</sub> : MALDI-TOF-MS of ECVCP prepared by ATRROP

S<sub>4</sub>: GPC traces of poly (ECVCP) prepared by ATRROP

**4. DSC traces of PECVCP prepared by RROP**

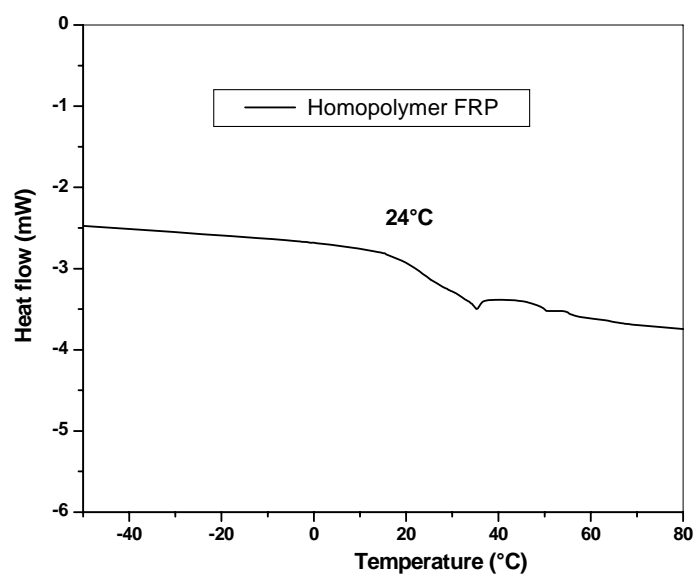

**S1: DSC traces of PECVCP prepared by RROP**

## 5. DSC traces of PECVCP prepared by ATRROP

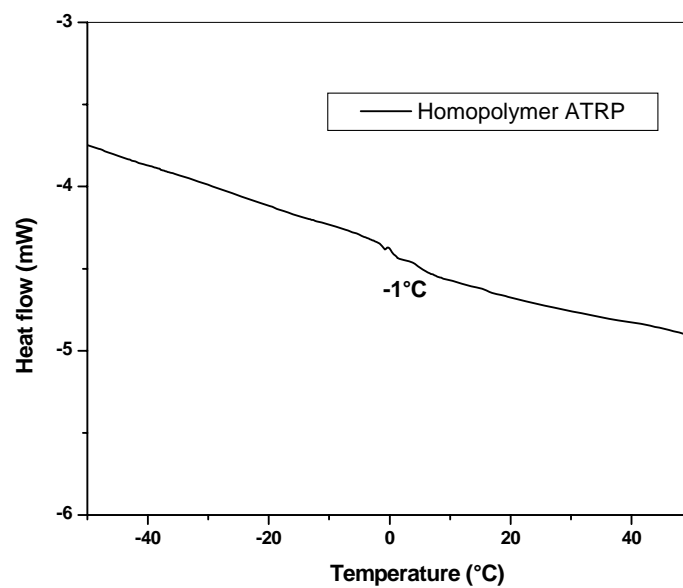

**S2: DSC Traces of PECVCP prepared by ATRROP**

## 6. MALDI-TOF-MS of ECVCP prepared by ATRROP

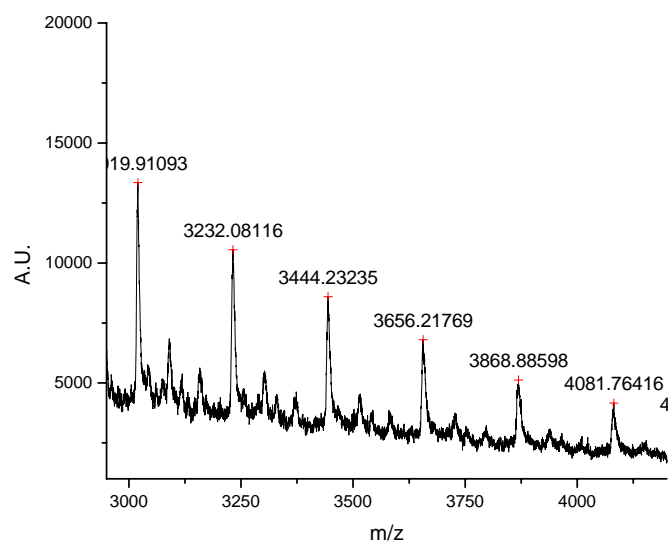

## S3: MALDI-TOF-MS of PECVCP prepared by ATRROP

## 6. GPC traces of poly (ECVCP) prepared by ATRROP

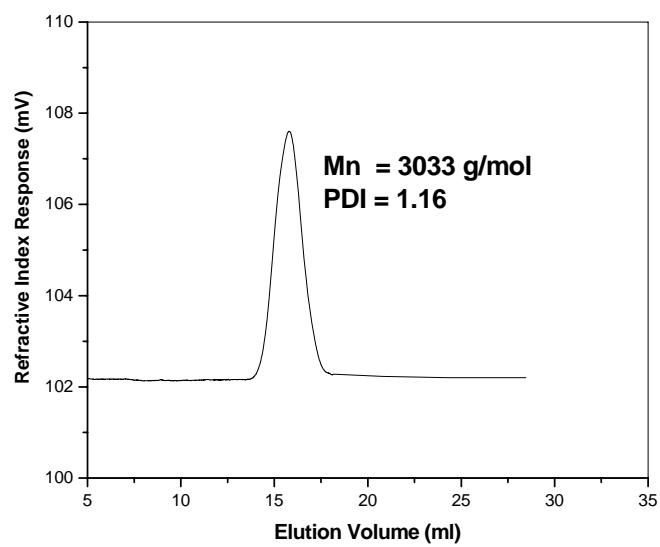

**S4: GPC traces of poly (ECVCP) prepared by ATRROP**
